# Supplementary material
Source: PubMed Central journal article supplement (PMC5539348)
Supplement: cr201767x4.pdf [file cr201767x4.pdf]

## Supplementary Information

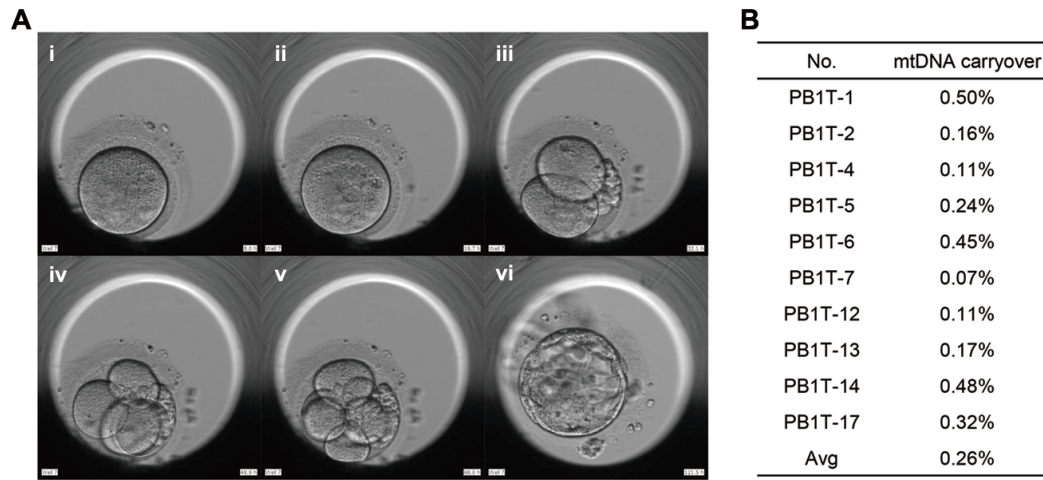

**Supplementary information, Figure S1** Generation of human PB1T embryos.

(A) Development of PB1T embryos.

(B) MtDNA carryover in PB1T blastocysts with genome integrity by ddPCR analysis.
